# Supplementary material
Source: PubMed Central journal article supplement (PMC7096904)
Supplement: 41588_2005_BFng1550_MOESM1_ESM.pdf [file 41588_2005_BFng1550_MOESM1_ESM.pdf]

**Supplementary Figure 1. Linkage disequilibrium between SNPs in *CD209* and flanking genes *CLEC4M* (*CD209L*) and *CLEC4G* (*LSECtin*)**

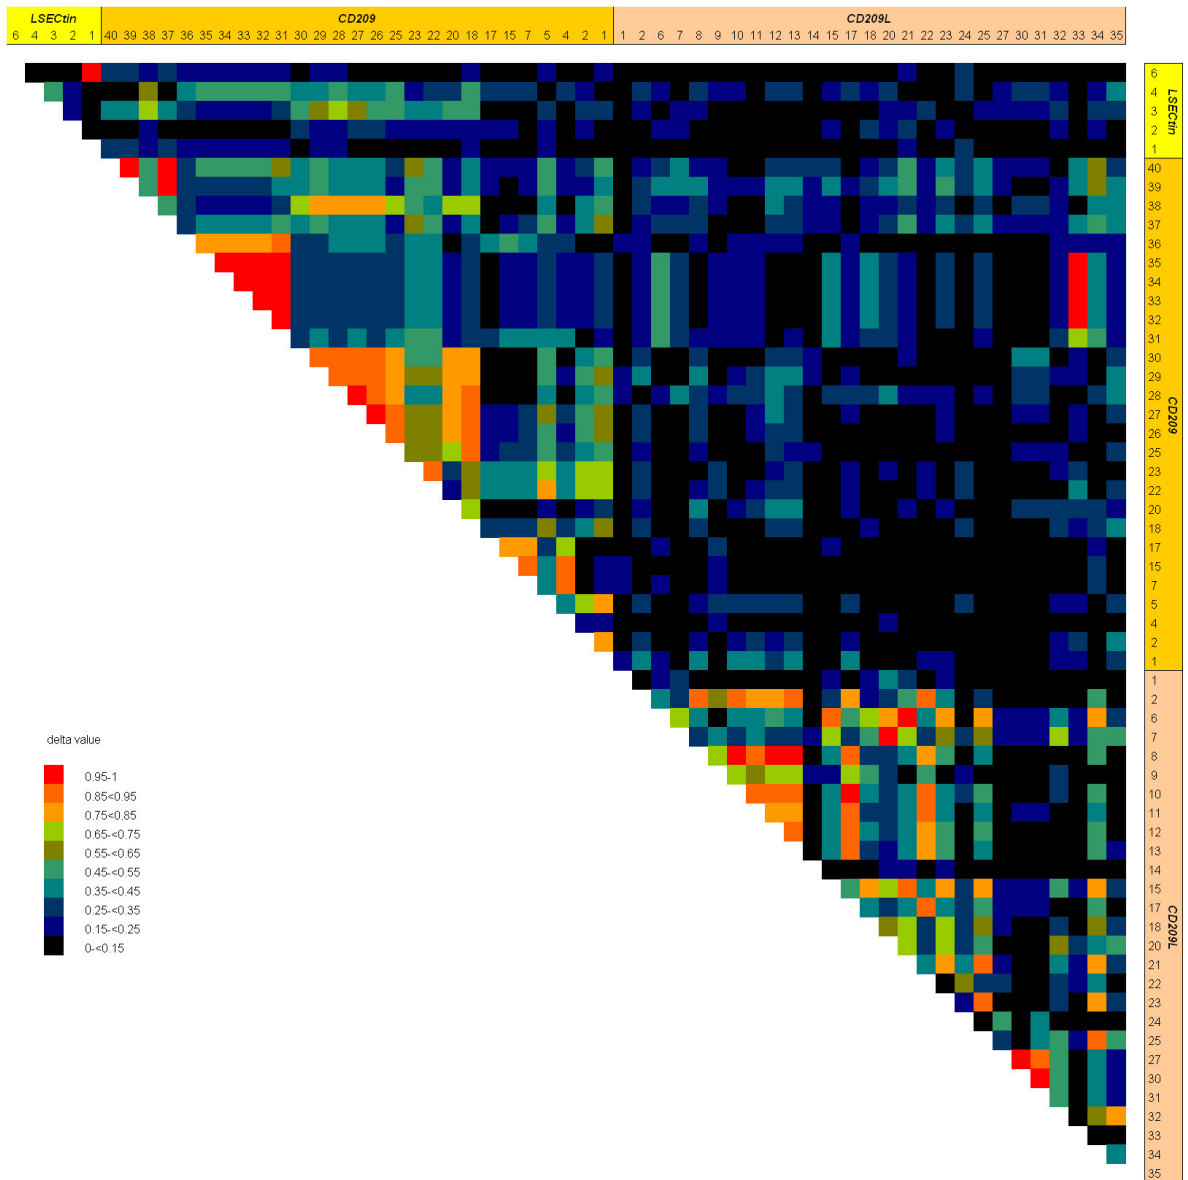

**Notes:**

Computation of  $\Delta$ -values was restricted to SNPs with rare allele frequency  $\geq 0.02$ . Polymorphism DCSIGN2-ex4RPT (code 9) is multiallelic, and the  $\Delta$ -value was computed using the most frequent allele and all other alleles grouped. None of the other alleles showed significant LD with SNPs located in *CD209*.
