# Supplementary material
Source: PubMed Central journal article supplement (PMC7096904)
Supplement: 41588_2005_BFng1550_MOESM2_ESM.pdf [file 41588_2005_BFng1550_MOESM2_ESM.pdf]

## Supplementary Table 1. Populations studied

### a. Patients and controls in three cohorts

|               | Ramathibodi hospital (RA) |             |               | Siriraj hospital (SI) |             |               | Khon Kaen hospital |            |               | Total       |
|---------------|---------------------------|-------------|---------------|-----------------------|-------------|---------------|--------------------|------------|---------------|-------------|
|               | Number (%)                | Female (%)  | Mean age (SD) | Number (%)            | Female (%)  | Mean age (SD) | Number (%)         | Female (%) | Mean age (SD) | Number (%)  |
| Controls      | 296                       |             |               | 216                   |             |               | 184                |            |               | 696         |
| Patients      | 235                       | 113 (48.1%) | 10.46 (2.83)  | 241                   | 127 (52.7%) | 9.09 (2.28)   | 130                | 65 (50%)   | 9.61 (2.70)   | 606         |
| DF            | 52 (22.1%)                | 27 (51.9%)  | 10.01 (2.87)  | 73 (30.3%)            | 42 (57.5%)  | 9.07 (2.12)   | 27 (20.8%)         | 15 (55.6%) | 9.91 (2.82)   | 152 (25.1%) |
| DHF grade I   | 59 (25.1%)                | 22 (37.3%)  | 10.42 (2.89)  | 41 (17.0%)            | 20 (48.8%)  | 9.56 (2.51)   | 30 (23.1%)         | 11 (36.7%) | 9.20 (2.72)   | 130 (21.5%) |
| DHF grade II  | 86 (36.6%)                | 41 (47.7%)  | 10.99 (2.76)  | 85 (35.3%)            | 44 (51.8%)  | 9.19 (2.26)   | 50 (38.5%)         | 26 (52%)   | 9.79 (2.84)   | 221 (36.5%) |
| DHF grade III | 27 (11.5%)                | 18 (66.7%)  | 10.38 (2.89)  | 33 (13.7%)            | 16 (48.5%)  | 8.47 (2.40)   | 23 (17.7%)         | 13 (56.5%) | 9.41 (2.27)   | 83 (13.7%)  |
| DHF grade IV  | 11 (4.7%)                 | 5 (45.5%)   | 8.88 (2.12)   | 9 (3.7%)              | 5 (55.6%)   | 8.56 (2.13)   | 0 (0.0%)           | 0          |               | 20 (3.3%)   |
| DHF (all)     | 183 (77.9%)               | 86 (47.0%)  | 10.59 (2.82)  | 168 (69.7%)           | 85 (50.6%)  | 9.10 (2.35)   | 103 (79.2%)        | 50 (48.5%) | 9.53 (2.68)   | 454 (74.9%) |

### b. Disease severity and primary/secondary infections

|     | Primary infection | Secondary infection | Total |
|-----|-------------------|---------------------|-------|
| DF  | 33 (22.0%)        | 117 (78.0%)         | 150   |
| DHF | 35 (7.9%)         | 410 (92.1%)         | 445   |

Note:

DF, dengue fever; DHF, dengue hemorrhagic fever.
