# Supplementary material
Source: PubMed Central journal article supplement (PMC7096904)
Supplement: 41588_2005_BFng1550_MOESM3_ESM.pdf [file 41588_2005_BFng1550_MOESM3_ESM.pdf]

**Supplementary Table 2. Description of *CD209* polymorphisms**

| Code | Polymorphism Name      | NCBI rs number    | Position on NT_077812.2 | Nucleotide change <sup>a</sup> | Position on cDNA <sup>b</sup> (NM_021155) | Amino acid change (NP_066978)    | Allele Frequency     |               |                 | LD group <sup>c</sup> | LD to DCSIGN1-336 $\Delta$ (P-value) |
|------|------------------------|-------------------|-------------------------|--------------------------------|-------------------------------------------|----------------------------------|----------------------|---------------|-----------------|-----------------------|--------------------------------------|
|      |                        |                   |                         |                                |                                           |                                  | Rare allele (DF+DHF) | DF+DHF (N=48) | controls (N=32) |                       |                                      |
| 1    | DCSIGN1-939            | rs735240          | 417332                  | G/A                            | 5' (repeat)                               |                                  | A                    | 0.33          | 0.17            | B                     | .21 (.07)                            |
| 2    | DCSIGN1-871            | rs735239          | 417264                  | A/G                            | 5' (repeat)                               |                                  | G                    | 0.24          | 0.17            | B                     | .17 (.26)                            |
| 3    | DCSIGN1-564            |                   | 416953                  | A/G                            | 5' (repeat)                               |                                  | G                    | 0.01          | 0.00            | -                     | -                                    |
| 4    | <b>DCSIGN1-336</b>     | <b>rs4804803</b>  | <b>416729</b>           | <b>A(2)/G(1)</b>               | <b>promoter</b>                           |                                  | <b>G</b>             | <b>0.08</b>   | <b>0.08</b>     | <b>A</b>              | -                                    |
| 5    | <b>DCSIGN1-139</b>     | <b>rs2287886</b>  | <b>416532</b>           | <b>A(2)/G(1)</b>               | <b>promoter</b>                           |                                  | <b>G</b>             | <b>0.39</b>   | <b>0.25</b>     | <b>B</b>              | <b>.41 (6x10<sup>-5</sup>)</b>       |
| 6    | DCSIGN1-116            |                   | 416509                  | G/T                            | promoter                                  |                                  | T                    | 0.01          | 0.02            | -                     | -                                    |
| 7    | <b>DCSIGN1.in2+11</b>  | <b>rs7252229</b>  | <b>416177</b>           | <b>G(2)/C(1)</b>               | <b>intron 2</b>                           |                                  | <b>C</b>             | <b>0.06</b>   | <b>0.06</b>     | <b>A</b>              | <b>.91 (&lt;10<sup>-5</sup>)</b>     |
| 8    | DCSIGN1.in2+24         |                   | 416164                  | C/T                            | intron 2 (repeat)                         |                                  | T                    | 0.01          | 0.00            | -                     | -                                    |
| 9    | DCSIGN1.in2 +246       |                   | 415942                  | C/A                            | intron 2                                  |                                  | A                    | 0.01          | 0.00            | -                     | -                                    |
| 10   | DCSIGN1.in2-353        |                   | 415766                  | A/G                            | intron 2                                  |                                  | G                    | 0.02          | 0.00            | -                     | -                                    |
| 11   | DCSIGN1.in2-173        |                   | 415586                  | C/A                            | intron 2                                  |                                  | A                    | 0.01          | 0.00            | -                     | -                                    |
| 12   | <b>DCSIGN1.ex4SF</b>   |                   | <b>414519</b>           | <b>G(1)/A(2)</b>               | <b>exon 4</b>                             | <b>S210F<sup>d</sup></b>         | <b>A</b>             | <b>0.00</b>   | <b>0.00</b>     | -                     | -                                    |
| 13   | <b>DCSIGN1.ex4RPT</b>  |                   | <b>414401-919</b>       | <b>7.5(1)/others(2)</b>        | <b>exon 4</b>                             | <b>(23aa) repeat<sup>e</sup></b> | <b>non 7.5</b>       | <b>0.01</b>   | <b>0.00</b>     | -                     | -                                    |
| 14   | DCSIGN1.in4-28         | rs11465384        | 414002                  | G/A                            | intron 4                                  |                                  | A                    | 0.01          | 0.00            | -                     | -                                    |
| 15   | <b>DCSIGN1.in5-178</b> | <b>rs8105483</b>  | <b>413279</b>           | <b>C(2)/G(1)</b>               | <b>intron 5</b>                           |                                  | <b>G</b>             | <b>0.06</b>   | <b>0.03</b>     | <b>A</b>              | <b>.86 (&lt;10<sup>-5</sup>)</b>     |
| 16   | <b>DCSIGN1.ex6TI</b>   |                   | <b>413061</b>           | <b>G(2)/A(1)</b>               | <b>exon 6</b>                             | <b>T314I</b>                     | <b>A</b>             | <b>0.01</b>   | <b>0.00</b>     | -                     | -                                    |
| 17   | <b>DCSIGN1.in6-37</b>  | <b>rs11465391</b> | <b>412159</b>           | <b>G(2)/C(1)</b>               | <b>intron 6</b>                           |                                  | <b>C</b>             | <b>0.04</b>   | <b>0.07</b>     | <b>A</b>              | <b>.69 (&lt;10<sup>-5</sup>)</b>     |
| 18   | DCSIGN1.1539           | rs4804802         | 411606                  | A/G                            | 3'UTR                                     |                                  | A                    | 0.43          | 0.62            | D                     | .33 (.01)                            |
| 19   | DCSIGN1.1599           | rs10403018        | 411546                  | G/A                            | 3'UTR                                     |                                  | A                    | 0.02          | 0.02            | -                     | -                                    |
| 20   | DCSIGN1.1667           | rs4804801         | 411478                  | T/A                            | 3'UTR                                     |                                  | A                    | 0.50          | 0.35            | D                     | .08 (.50)                            |
| 21   | DCSIGN1.1899           |                   | 411246                  | G/A                            | 3'UTR (repeat)                            |                                  | A                    | 0.00          | 0.02            | -                     | -                                    |
| 22   | DCSIGN1.1946           | rs6603119         | 411199                  | T/C                            | 3'UTR (repeat)                            |                                  | C                    | 0.34          | 0.24            | B                     | .39 (.004)                           |
| 23   | DCSIGN1.1978           | rs7248772         | 411167                  | A/G                            | 3'UTR (repeat)                            |                                  | G                    | 0.36          | 0.27            | B                     | .36 (.009)                           |
| 24   | DCSIGN1.2034           | rs11465401        | 411111                  | G/A                            | 3'UTR (repeat)                            |                                  | A                    | 0.02          | 0.02            | -                     | -                                    |
| 25   | DCSIGN1.2122           | rs7248637         | 411023                  | A/G                            | 3'UTR                                     |                                  | A                    | 0.37          | 0.58            | D                     | .30 (.02)                            |
| 26   | <b>DCSIGN1.2281</b>    | <b>rs1544767</b>  | <b>410864</b>           | <b>T(2)/A(1)</b>               | <b>3'UTR</b>                              |                                  | <b>T</b>             | <b>0.41</b>   | <b>0.50</b>     | <b>D</b>              | <b>.25 (.23)</b>                     |
| 27   | DCSIGN1.2426           | rs1544766         | 410719                  | G/A                            | 3'UTR                                     |                                  | G                    | 0.40          | 0.53            | D                     | .25 (.16)                            |

|           |                     |                   |               |                  |                  |          |             |             |          |                   |
|-----------|---------------------|-------------------|---------------|------------------|------------------|----------|-------------|-------------|----------|-------------------|
| 28        | DCSIGN1.2893        | rs12460694        | 410251        | G/A              | 3'UTR (repeat)   | A        | 0.32        | 0.62        | D        | .14 (.31)         |
| 29        | DCSIGN1.2916        |                   | 410226        | CCC/CC           | 3'UTR (repeat)   | CC       | 0.42        | 0.59        | D        | .18 (.14)         |
| 30        | DCSIGN1.2929        | rs11260028        | 410215        | AG               | 3'UTR (repeat)   | G        | 0.33        | 0.55        | D        | .14 (.19)         |
| 31        | DCSIGN1.2994        |                   | 410150        | GA               | 3'UTR (repeat)   | A        | 0.21        | 0.06        | C        | .36 (.06)         |
| 32        | DCSIGN1.3062        | rs11465409        | 410082        | GA               | 3'UTR (repeat)   | A        | 0.18        | 0.03        | C        | .15 (.35)         |
| 33        | DCSIGN1.3069        | rs11465410        | 410075        | TC               | 3'UTR (repeat)   | C        | 0.18        | 0.03        | C        | .15 (.35)         |
| 34        | DCSIGN1.3071        | rs11465411        | 410073        | AG               | 3'UTR (repeat)   | G        | 0.18        | 0.03        | C        | .15 (.35)         |
| 35        | DCSIGN1.3078        | rs11465412        | 410066        | G/A              | 3'UTR            | A        | 0.18        | 0.03        | C        | .15 (.35)         |
| <b>36</b> | <b>DCSIGN1.3197</b> | <b>rs11465413</b> | <b>409947</b> | <b>A(2)/T(1)</b> | <b>3'UTR</b>     | <b>T</b> | <b>0.14</b> | <b>0.14</b> | <b>C</b> | <b>.34 (.008)</b> |
| <b>37</b> | <b>DCSIGN1.3852</b> | <b>rs11465421</b> | <b>409292</b> | <b>G(1)/T(2)</b> | <b>3'UTR</b>     | <b>T</b> | <b>0.25</b> | <b>0.24</b> | <b>E</b> | <b>.24 (.14)</b>  |
| 38        | DCSIGN1.4020        | rs4804800         | 409124        | G/A              | 3'UTR (repeat)   | G        | 0.43        | 0.54        | D        | .14 (.39)         |
| 39        | DCSIGN1.43041       | rs11260027        | 408812        | G/A              | 3' to transcript | A        | 0.22        | 0.25        | E        | .19 (.24)         |
| 40        | DCSIGN1.42955       | rs11670387        | 408726        | T/C              | 3' to transcript | C        | 0.25        | 0.25        | E        | .18 (.27)         |

Notes:

Polymorphisms that were selected for genotyping are shown in bold.

- a. The first allele corresponds to the reference allele on NT\_077812.2. Allele code (1, 2) is shown for polymorphisms that have been genotyped.
- b. Polymorphisms located in repeated regions (LINE, SINE, LTR) are indicated.
- c. LD groups were defined as groups of polymorphisms in LD, with  $\Delta$  value  $>0.75$  with at least one member of the group, with rare allele frequency  $>0.02$ .
- d. DCSIGN1.ex4SF polymorphism was identified by additional sequencing in a complementary panel of 32 dengue patients.
- e. DCSIGN1.ex4RPT polymorphism consisted of a variable number of repeats of a 69-bp unit (23 amino-acids). The frequent variant has 7.5 repeats, other alleles of 8.5, 6.5, 5.5 and 4.5 repeats were identified in the Thai population.

DF, dengue fever; DHF, dengue hemorrhagic fever.
