# Supplementary material
Source: PubMed Central journal article supplement (PMC7096904)
Supplement: 41588_2005_BFng1550_MOESM4_ESM.pdf [file 41588_2005_BFng1550_MOESM4_ESM.pdf]

**Supplementary Table 3. Haplotypes constructed from the five SNPs in LD with DCSIGN1-336 and their frequencies.**

| Haplotype | DCSIGN1-336 | DCSIGN1-139 | DCSIGN1In2+11 | DCSIGN1.In5-178 | DCSIGN1In6-37 | controls | DF   | DHF  |
|-----------|-------------|-------------|---------------|-----------------|---------------|----------|------|------|
| 1         | A           | A           | G             | C               | G             | 68.2     | 72.2 | 69.9 |
| 2         | A           | G           | G             | C               | G             | 20.7     | 24.5 | 18.1 |
| 3         | G           | G           | C             | G               | C             | 5.7      | 1.7  | 5.3  |
| 4         | G           | G           | G             | C               | G             | 2.3      | 0.3  | 3.3  |
| 5         | G           | G           | C             | G               | G             | 2.3      | 0.0  | 2.6  |
| 6         | A           | A           | G             | C               | C             | 0.5      | 1.0  | 0.0  |
| other     |             |             |               |                 |               | 0.4      | 0.3  | 0.8  |

Note:

DF, dengue fever; DHF, dengue hemorrhagic fever.
