# Supplementary material
Source: PubMed Central journal article supplement (PMC7096904)
Supplement: 41588_2005_BFng1550_MOESM5_ESM.pdf [file 41588_2005_BFng1550_MOESM5_ESM.pdf]

**Supplementary Table 4. Description of *CLEC4G* (*LSECtin*) and *CLEC4M* (*CD209L*) polymorphisms**

| Polymorphism                                                          |                 | NCBI<br>rs number | Position on<br>NT_077812.2 | Nucleotide<br>change <sup>a</sup> | Position on cDNA <sup>b</sup> | Amino acid<br>change | Allele Frequency |             | LD to <i>DCSIGN1-336</i><br>$\Delta$ (P-value) |
|-----------------------------------------------------------------------|-----------------|-------------------|----------------------------|-----------------------------------|-------------------------------|----------------------|------------------|-------------|------------------------------------------------|
| Code                                                                  | Name            |                   |                            |                                   |                               |                      | Rare allele      | Thai (N=80) |                                                |
| <i>CLEC4G</i> ( <i>LSECtin</i> , cDNA: NM_198492, protein: NP_940894) |                 |                   |                            |                                   |                               |                      |                  |             |                                                |
| 1                                                                     | LSECtin-217     |                   | 401200                     | G/A                               | promoter                      |                      | A                | 0.02        | .04 (.49)                                      |
| 2                                                                     | LSECtin.ex2+2   |                   | 400652                     | C/T                               | exon2                         | G19G                 | T                | 0.05        | .10 (.43)                                      |
| 3                                                                     | LSECtin.in2+50  | rs11260026        | 400493                     | C/G                               | intron2                       |                      | C                | 0.70        | .09 (.38)                                      |
| 4                                                                     | LSECtin.in2-30  | rs12978097        | 400231                     | C/T                               | intron2                       |                      | T                | 0.40        | .27 (.06)                                      |
| 5                                                                     | LSECtin.in7-30  |                   | 398848                     | G/A                               | intron7                       |                      | A                | 0.01        | -                                              |
| 6                                                                     | LSECtin.ex9+325 |                   | 398062                     | A/G                               | 3'UTR                         |                      | G                | 0.02        | .04 (.47)                                      |
| 7                                                                     | LSECtin.ex9+397 |                   | 397990                     | G/A                               | 3'UTR                         |                      | A                | 0.01        | -                                              |
| <i>CLEC4M</i> ( <i>CD209L</i> , cDNA: NM_014257, protein: NP_055072)  |                 |                   |                            |                                   |                               |                      |                  |             |                                                |
| 1                                                                     | DCSIGN2-593     |                   | 431556                     | C/T                               | 5' (repeat)                   |                      | T                | 0.02        | .14 (.28)                                      |
| 2                                                                     | DCSIGN2-577     | rs11260029        | 431572                     | T/C                               | 5' (repeat)                   |                      | C                | 0.17        | .13 (.12)                                      |
| 3                                                                     | DCSIGN2-553     |                   | 431596                     | A/T                               | promoter                      |                      | T                | 0.005       | -                                              |
| 4                                                                     | DCSIGN2-343     |                   | 431806                     | C/A                               | promoter                      |                      | A                | 0.005       | -                                              |
| 5                                                                     | DCSIGN2-323     | rs571497          | 431826                     | G/A                               | promoter                      |                      | A                | 0.005       | -                                              |
| 6                                                                     | DCSIGN2-198     | rs2287887         | 431951                     | C/A                               | promoter                      |                      | A                | 0.44        | .07 (.58)                                      |
| 7                                                                     | DCSIGN2.in2-180 |                   | 433887                     | G/A                               | intron2 (repeat)              |                      | A                | 0.30        | .03 (.82)                                      |
| 8                                                                     | DCSIGN2.in2-125 | rs594793          | 433942                     | G/T                               | intron2                       |                      | T                | 0.14        | .13 (.30)                                      |
| 9                                                                     | DCSIGN2.ex4RPT  |                   | 434570/435089              | 7.5/others                        | exon4                         | (23aa) repeat        | non 7.5          | 0.31        | .15 (.19)                                      |
| 10                                                                    | DCSIGN2.in4+93  | rs868875          | 435162                     | A/G                               | intron4 (repeat)              |                      | G                | 0.22        | .13 (.26)                                      |
| 11                                                                    | DCSIGN2.in4+133 | rs868876          | 435222                     | A/T                               | intron4 (repeat)              |                      | T                | 0.28        | .15 (.16)                                      |
| 12                                                                    | DCSIGN2.in4+336 | rs475896          | 435425                     | C/G                               | intron4                       |                      | G                | 0.21        | .07 (.70)                                      |
| 13                                                                    | DCSIGN2.ex5DN   | rs2277998         | 435624                     | G/A                               | exon5                         | D291N                | A                | 0.15        | .12 (.31)                                      |
| 14                                                                    | DCSIGN2.ex5+92  |                   | 435629                     | C/T                               | exon5                         | S292S                | T                | 0.005       | .03 (.69)                                      |
| 15                                                                    | DCSIGN2.in5+7   | rs562607          | 435696                     | G/C                               | intron5                       |                      | C                | 0.44        | 0 (.93)                                        |
| 16                                                                    | DCSIGN2.in5+260 | rs560634          | 435949                     | G/T                               | intron5                       |                      | T                | 0.005       | -                                              |
| 17                                                                    | DCSIGN2.in5+309 | rs874492          | 435997                     | A/T                               | intron5 (repeat)              |                      | T                | 0.14        | .13 (.24)                                      |
| 18                                                                    | DCSIGN2.in5-219 | rs558705          | 436179                     | A/G                               | intron5                       |                      | A                | 0.42        | .08 (.49)                                      |
| 19                                                                    | DCSIGN2.in5-116 | rs557094          | 436282                     | C/G                               | intron5                       |                      | G                | 0.005       | -                                              |
| 20                                                                    | DCSIGN2.in6+150 | rs2161525         | 436660                     | T/C                               | intron6                       |                      | C                | 0.39        | .16 (.26)                                      |
| 21                                                                    | DCSIGN2.in6+445 | rs8113469         | 436955                     | C/T                               | intron6 (repeat)              |                      | T                | 0.50        | .07 (.62)                                      |
| 22                                                                    | DCSIGN2.in6-653 | rs12610506        | 437067                     | G/A                               | intron6 (repeat)              |                      | A                | 0.13        | 0 (.94)                                        |
| 23                                                                    | DCSIGN2.in6-511 | rs8105492         | 437209                     | G/T                               | intron6 (repeat)              |                      | T                | 0.40        | 0 (.97)                                        |

|    |                 |           |               |               |                  |       |        |       |           |
|----|-----------------|-----------|---------------|---------------|------------------|-------|--------|-------|-----------|
| 24 | DCSIGN2.in6-316 | rs657855  | 437404        | C/T           | intron6          |       | T      | 0.05  | .08 (.27) |
| 25 | DCSIGN2.in6-268 | rs9329374 | 437452        | T/C           | intron6 (repeat) |       | C      | 0.48  | 0 (.89)   |
| 26 | DCSIGN2.in6-256 |           | 437464        | A/G           | intron6          |       | G      | 0.01  | -         |
| 27 | DCSIGN2.in6-34  | rs3745376 | 437686        | G/T           | intron6          |       | T      | 0.10  | .10 (.09) |
| 28 | DCSIGN2.ex7+127 |           | 437846        | C/T           | exon7            | P392P | T      | 0.005 | -         |
| 29 | DCSIGN2.ex7+153 |           | 437872        | T/A           | 3'UTR            |       | A      | 0.005 | -         |
| 30 | DCSIGN2.ex7+217 |           | 437936        | G/A           | 3'UTR            |       | A      | 0.08  | .09 (.25) |
| 31 | DCSIGN2.ex7+259 | rs1045997 | 437978        | C/T           | 3'UTR            |       | T      | 0.07  | .09 (.25) |
| 32 | DCSIGN2.ex7+551 | rs15282   | 438270        | C/T           | 3'UTR            |       | T      | 0.25  | .14 (.40) |
| 33 | DCSIGN2.72839   |           | 438610        | A/T           | 3' to transcript |       | T      | 0.07  | .04 (.64) |
| 34 | DCSIGN2.72945   | rs684388  | 438716        | T/C           | 3' to transcript |       | C      | 0.44  | .12 (.41) |
| 35 | DCSIGN2.73428   |           | 439199/439210 | (CAA)4/(CAA)3 | 3' to transcript |       | (CAA)3 | 0.13  | .09 (.51) |
| 36 | DCSIGN2.73510   |           | 439281        | T/C           | 3' to transcript |       | C      | 0.005 | -         |

Notes:

<sup>a</sup> The first allele corresponds to the reference allele on NT\_077812.2.

<sup>b</sup> Polymorphisms located in repeated regions (LINE, SINE, LTR) are indicated.
