# Supplementary material
Source: PubMed Central journal article supplement (PMC7096904)
Supplement: 41588_2005_BFng1550_MOESM6_ESM.pdf [file 41588_2005_BFng1550_MOESM6_ESM.pdf]

**Supplementary Table 5. Sequencing primers for *CD209*, *CLEC4M (CD209L)* and *CLEC4G (LSECtin)***

| Region amplified <sup>a</sup>      | PCR primers            |                       | Sequencing Primers <sup>b</sup> |                      | Product size |
|------------------------------------|------------------------|-----------------------|---------------------------------|----------------------|--------------|
|                                    | Forward (5'-3')        | Reverse (5'-3')       | Forward (5'-3')                 | Reverse (5'-3')      |              |
| <i>CD209</i>                       |                        |                       |                                 |                      |              |
| Promoter_1                         | ACTGTGTTACACCCCCTCCA   | CACACATGTGGTAAATGCACA |                                 |                      | 789          |
| Promoter_2, exon 1                 | CTCCCCCTTCCCAGAATC     | CAAAAATGAGGACAGCAGCA  |                                 |                      | 695          |
| exon 1, exon 2                     | AGGTACCTGCTTCCACCTCC   | TGGATGACAGATCCCTACCC  | CCCAAACCTCAACCTCCTCAG           | TTGGGAGGAGAGACGAGAGA | 903          |
| exon 3, exon 4                     | TCCAGATACTCACCCACTGC   | CAGGGACCTGGGAATGTAGA  | ACTTATGGAGCTGGGGACCT            | GATTCCCAGGTGTTGGAGTG | 1164         |
| exon 4                             | CACCACACAACGACCATCTC   | AGGTCCCCAGCTCCATAAGT  |                                 |                      | 616          |
| exon 5                             | CGGAGCATTACACATGTTC    | GCTGGGCAGGTACAGGAATA  |                                 |                      | 414          |
| exon 6                             | CTGCTGGTGGAAATTCTAGGC  | AGCAAGAGGGTGTGAGGAGA  |                                 |                      | 534          |
| exon 7_1                           | TCTACACCAGGGGAAATTGG   | AGTCCAGCATAACACACGCAG |                                 |                      | 470          |
| exon 7_2                           | TTGGTTGACTGGGGGAATTA   | GCTGGAACGACGACAAATG   |                                 |                      | 587          |
| exon 7_3                           | TCCCAAAGTCGTGGTAGGAG   | TTTGATCGGGGACTTACTGG  |                                 |                      | 595          |
| exon 7_4                           | TGCAACTTGGAACTCACCT    | TGGGATTTGGGACTCTGAAC  |                                 |                      | 592          |
| exon 7_5                           | TCCCAACATCCAGTCCCTACC  | TTGGCATTCTTCTCCGACT   | AAGCAAGCCTGGAGTACAGC            | CAGGTGAGGTTCCAAGTTGC | 605          |
| exon 7_6                           | CGAAAAGGTGACATTTCCAGA  | GCAGCACATCCTCACAGAAA  |                                 |                      | 699          |
| exon 7_7                           | GCATCTTTGGGGTCAACATC   | TGGCGTTTCTTTCGTTTCTC  |                                 |                      | 922          |
| <i>CLEC4M (CD209L)<sup>c</sup></i> |                        |                       |                                 |                      |              |
| Promoter_1                         | TGCCCTTGATGTTATTAGACCC | TTCCACCCTCTGATCCTCAC  |                                 |                      | 662          |
| Promoter_2, exon 1,<br>exon 2_1    | CGATCTCAGGCTCTGACTCC   | GGCCATGTATCTGCTGGAAT  |                                 |                      | 363          |
| exon 2_2                           | AAGATCCAACAACCAAGTGGC  | CTTCCCCAGGACCCAGTAAT  |                                 |                      | 517          |
| exon 3                             | GGGAGGTGGACGCAGGTA     | TCCTGCTCTAGAGTGGGGAG  |                                 |                      | 520          |
| exon 4_1                           | ATGAACAGAGCCTGGAGTGG   | AGCTTGGATTTCTCTGGCAA  |                                 |                      | 499          |
| exon 4_2, exon 5                   | GTTGCCAGAGAAATCCAAGC   | GTACCTGGGACCCCTTCATT  |                                 |                      | 884          |
| exon 5, exon 6                     | CTGTCCAAGGACTGGACAT    | CCAGGGAAAGCTCAAGTCAG  |                                 |                      | 1031         |
| exon 6, exon 7_1                   | CTGACTTGAGCTTCCCTGG    | ACTGCCACTAAATCCGCAC   |                                 |                      | 1228         |

|                         |                      |                      |                      |                      |      |
|-------------------------|----------------------|----------------------|----------------------|----------------------|------|
| exon 7_2                | CAGCAAGAGAGGCAGGAACT | GCTCCTTCAACCAGCAAGTC |                      |                      | 762  |
| exon 7_3                | GACCTGAGTGGGATGCATT  | AGCCTCACAGTTCTCATGCC |                      |                      | 1256 |
| <i>CLEC4G (LSEctin)</i> |                      |                      |                      |                      |      |
| Promoter_1              | ATGCCTGAAATGGTGCTAGG | CCAAATTGTAACCCCTGCTG |                      |                      | 532  |
| Promoter_2, exon1       | TGGATCAAGGTCAGGTTCAA | TTGCTGTACCTGGTGGTGTC |                      |                      | 520  |
| exon 1                  | AAGGCCAAGAAAATGGGAAG | AGGACTGTGGTGACCAGGAC |                      |                      | 506  |
| exon 2                  | GAGGGAAGAGTCGAGACAGG | GGCCCAAAGATGTACACACA |                      |                      | 465  |
| exon 3, exon 4, exon 5  | TGCACATCGTGTGAGCTGTA | GGATTATGGCTGGGGTCAG  | GGAGATGGAGTCTCGAGTGC | GTCACCTGGGAGGACTCAGG | 986  |
| exon 6, exon 7          | CAGGGGTCCTGACCTTTAGC | AAAGGAGGGGACATCTGAGC |                      |                      | 582  |
| exon 8                  | TGTGCCAAAGACGACGTG   | AGCCTGCCCATCCCTAAGTA |                      |                      | 406  |
| exon 9                  | ACCCCGAGTTCATCCTCTGT | GGCCAAGAGGTCACTGAGAG |                      |                      | 701  |

Notes:

<sup>a</sup> In regions encompassing introns, the corresponding introns were also sequenced.

<sup>b</sup> These primers were used as sequencing primers in addition to PCR primers to cover the whole region.

<sup>c</sup> Numbering of *CLEC4M (CD209L)* exons is according to NM014257
