# Supplementary material
Source: PubMed Central journal article supplement (PMC7096904)
Supplement: 41588_2005_BFng1550_MOESM7_ESM.pdf [file 41588_2005_BFng1550_MOESM7_ESM.pdf]

**Supplementary Table 6. PCR-RFLP genotyping and PCR gel electrophoresis assays**

| SNP name                    | Primer Forward (5'-3') | Primer Reverse (5'-3') | Restriction enzyme | Undigested product size | Digested product size allele 1 / allele 2 |
|-----------------------------|------------------------|------------------------|--------------------|-------------------------|-------------------------------------------|
| DCSIGN1-336                 | GGATGGTCTGGGGTTGACAG   | ACTGGGGGTGCTACCTGGC    | MscI               | 150                     | 150 [A] / 131+19 [G]                      |
| DCSIGN1-139                 | TTTCCCACCCTGTGATCTTT   | CTGCCTCCCTGAAATTCTTG   | SpeI               | 148                     | 148 [G] / 89+59 [A]                       |
| DCSIGN1.in2+11              | CCCAAACCTCAACCTCCTCAG  | CTTGGATTCCGACAGACTCG   | DdeI               | 191                     | 65[C] / 47+18[G], 74, 35, 17              |
| DCSIGN1.ex4SF               | CACCACACAACGACCATCTC   | AGGTCCCCAGCTCCATAAGT   | ApoI               | 616 <sup>a</sup>        | 616 [G] / 444+172 [A]                     |
| DCSIGN1.ex4RPT <sup>b</sup> | CACCACACAACGACCATCTC   | AGGTCCCCAGCTCCATAAGT   | NONE               | 686/616/547/478/409     |                                           |
| DCSIGN1.2281                | AGCTCCAAGGGGAGAGAGAG   | TCCTCCTACCACGACTTTGG   | EcoNI              | 282                     | 282 [A] / 170+112 [T]                     |

Notes:

<sup>a</sup> size of the most frequent allele

<sup>b</sup> alleles were separated by agarose gel electrophoresis directly after PCR
