# Supplementary material
Source: PubMed Central journal article supplement (PMC7096904)
Supplement: 41588_2005_BFng1550_MOESM8_ESM.pdf [file 41588_2005_BFng1550_MOESM8_ESM.pdf]

**Supplementary Table 7. TaqMan genotyping assays**

| SNP name        | Primer Forward (5'-3')     | Primer Reverse (5'-3')    | Probe-FAM (5'-3')   | Probe-VIC (5'-3')    |
|-----------------|----------------------------|---------------------------|---------------------|----------------------|
| DCSIGN1-336     | ACTGTGTTACACCCCCTCCACTAG   | AGGAAAGCCAGGAGGTCACA      | CTACCTGCCCACCC      | CTGCCTACCCTTGC       |
| DCSIGN1.in5-178 | CCAGCTGTGCATGGATGTGT       | TCCCTCTCACATGTGTATCCCA    | CATGTCAGCACACATG    | CATGTCAGGACACATG     |
| DCSIGN1.ex6TI   | CGTGCCTTCCTGATTTAGATCTGAA  | AGCTGCAGTCTTCCAGAAGTAAC   | CATCCAGATGAAGCG     | CATCCAGGTGAAGCG      |
| DCSIGN1.in6-37  | AGCCCATGCGGAATGTGA         | CAGAAGGTAGAAACACAGCTCATGT | TCTGTCCCCCCCAGCT    | CTGTCCCCGCCAGCT      |
| DCSIGN1.3197    | CAACATCCAGTCCTACCCTTCTTATT | GCTTGCTTCGGAGTCATAGTCATC  | ACTGCTCCATTCCAAA    | CACTGCTCCTTTCCAAA    |
| DCSIGN1.3852    | AGTTGAACCAGATTGGGCTGAAT    | CCGCCCTCTAGTTGTATCCTTTAT  | CAATGTTTACCATTTTATT | ACAATGTTTACCAGTTTATT |
